# Supplementary material
Source: PubMed Central journal article supplement (PMC3023160)
Supplement: NIHMS255493-supplement-supplement_1.pdf [file NIHMS255493-supplement-supplement_1.pdf]

## Figure Legends

Supplementary Figure 1. A. Distribution of liver phantom ratio and liver spleen ratio in all, men, women. B. Plot of the sensitivity versus 1-specificity of different liver phantom ratio measures in determining fatty liver using a liver spleen ratio of 1.1 as the gold standard

Figure 1. Median and IQR (error bars) for triglycerides, high density lipoproteins (HDL), glucose, systolic blood pressure (SBP) and diastolic blood pressure (DBP) p: age, gender, and VAT corrected p value between fatty liver categories; histogram counts are shown in triglyceride panel apply to all panels. The high VAT category refers to those above the 90<sup>th</sup> percentile cut-point derived from a healthy referent sample.

## Figures

Figure 1

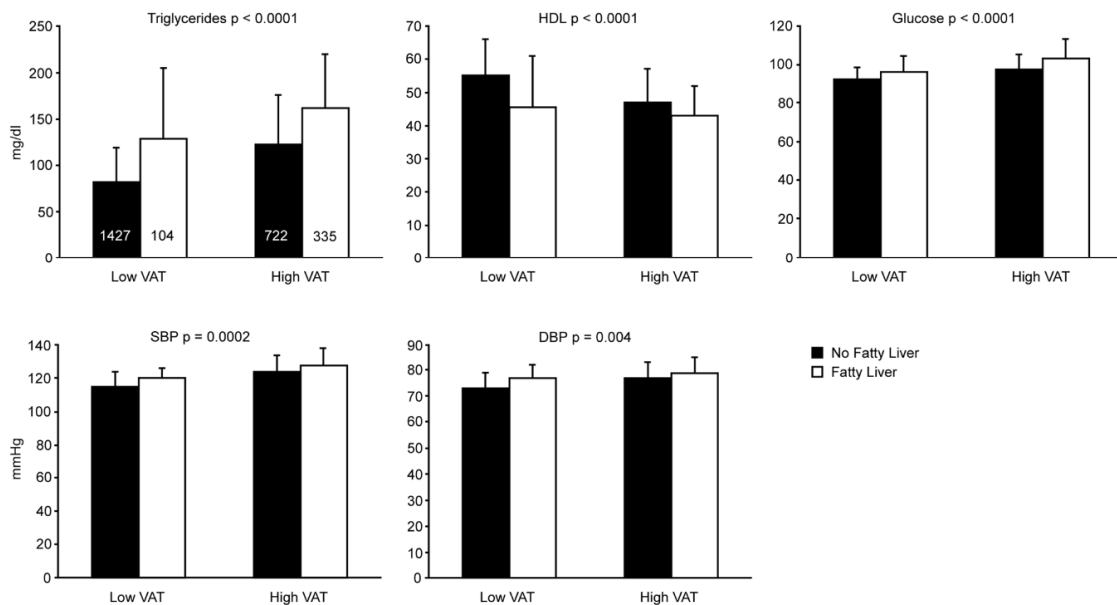

# Supplemental Figure 1

## A

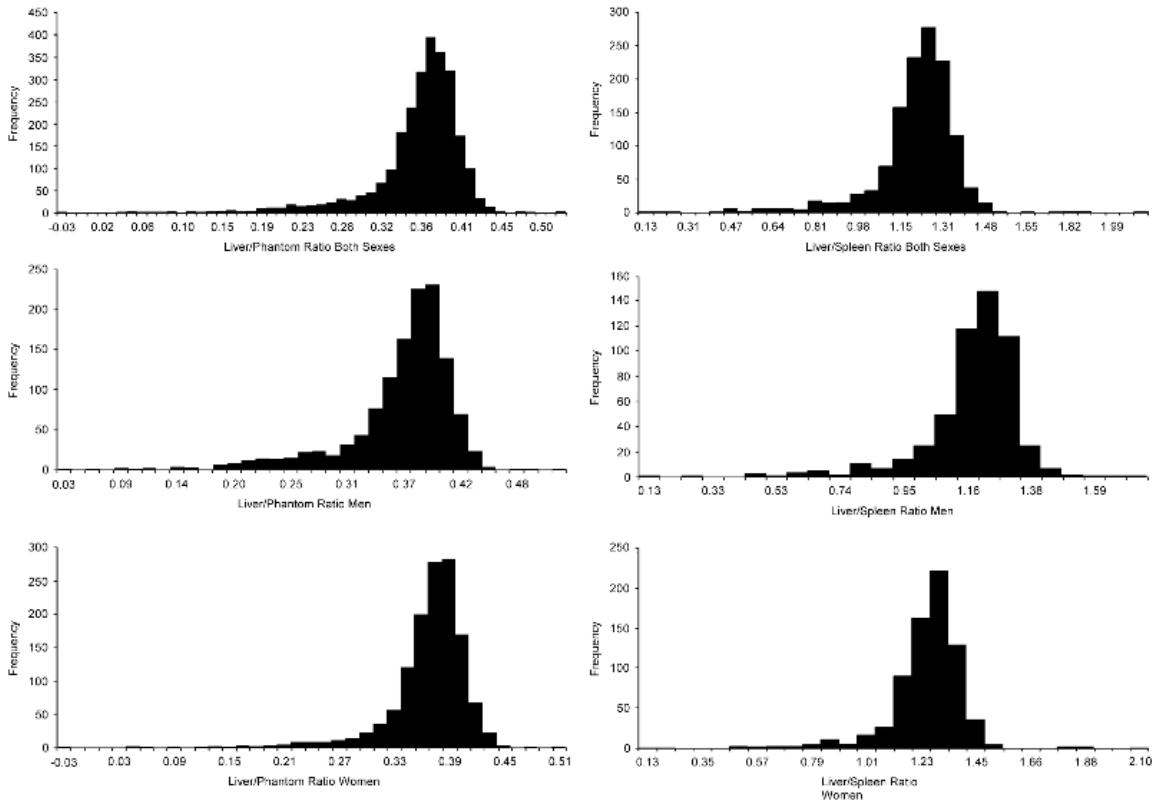

## B

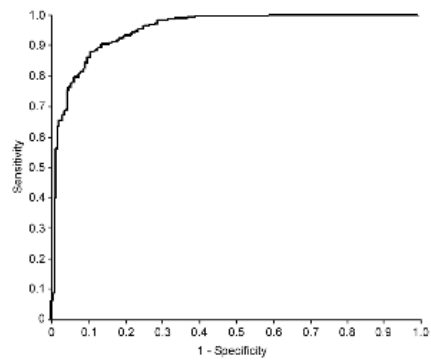

## Tables
